# Supplementary material for: Pushing the Ligand Efficiency Metrics: Relative Group Contribution (RGC) Model as a Helpful Strategy to Promote a Fragment “Rescue” Effect
Source: Front Chem. 2019 Aug 16;7:564. doi: 10.3389/fchem.2019.00564 (PMC6710606; doi:10.3389/fchem.2019.00564)
Supplement: Supplementary file 2 [file Table_2.DOCX]

**TABLE OF MATHEMATICAL TERMS**

|  | Equilibrium dissociation constant |
| --- | --- |
|  | Gibbs-free energy change |
|  | Difference between two distinct Gibbs-free energy changes |
|  | Number of non-hydrogen atoms |
|  | Difference in the number of non-hydrogen atoms |
|  | Group efficiency |
|  | Actual ligand efficiency (total) of a drug-sized compound. Also understood simply by LE. |
|  | Predicted ligand efficiency (total) according to the RGC model. Also understood as , it is, the weighted root mean square (WRMS) of LE. |
|  | Number of fragments composing a drug-sized compound |
|  | Gibbs-free energy change (total) of a drug-sized compound |
|  | Number of non-hydrogen atoms (total) of a drug-sized compound |
|  | Ligand efficiency for ‘ideal’ fragments with equal LE value |
|  | Ligand efficiency for fragment which LE value is known |
|  | Minimum ligand efficiency for fragments with unknown value. It corresponds to the minimum LE for accepting a fragment in unknown positions. |
|  | Minimum ligand efficiency for the last fragment with unknown value |
|  | Weight for ‘ideal’ fragments assuming that they all have the same LE value. This parameter is expressed as the number of atoms or the corresponding percentage of the entire molecule. |
|  | Weight for fragments which LE is known. This parameter is expressed as the number of atoms or the corresponding percentage of the entire molecule. |
|  | Weight for fragments with unknown LE value. This parameter is expressed as the number of atoms or the corresponding percentage of the entire molecule. |
